# Supplementary material for: Secular evolution of rhyolites: Insights into the onset of plate tectonics
Source: Copernicus journal article supplement (doi:10.5194/egusphere-2025-3124), 2025-10-27
Supplement: Supplementary file 1 [file Su et al.2025_Supplementary Figure and Caption.docx]

**
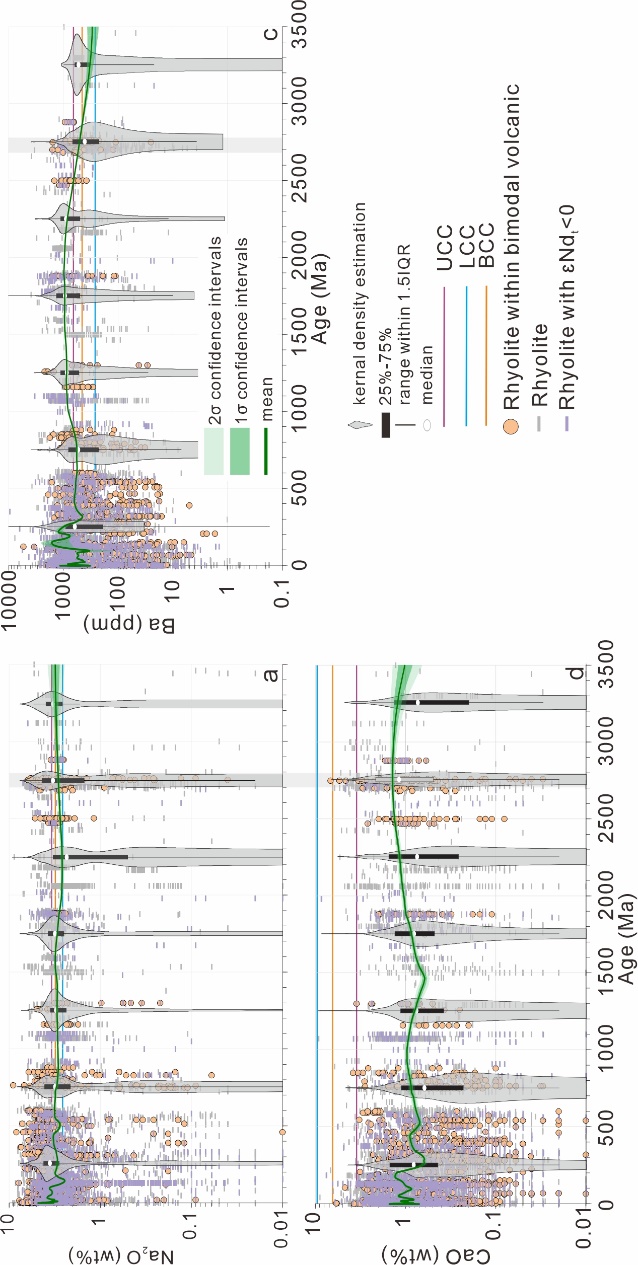
Supplementary Figures**

**Figure S1** The features of (**a**)Na2O; (**b**) CaO; (**c**)Ba of rhyolites through time. The compositions of present-day continental crust are adapted from (Rudnick and Gao, 2003). 350-Myr-bin moving average of rhyolite compositions together with the 1σ and 2σ confidence intervals acquired by bootstrap resampling (numbers=1000) are shown. The kernel density estimations, medians, inter-quartile range (IQR, 25%–75%) and range within 1.5IQR of each 500-Myr-bin are also constructed for all data without rejection (plotted as Violin with Box). UCC=upper continental crust; LCC=lower continental crust; BCC=bulk continental crust.

**References**

Rudnick, R. L. and Gao, S.: Composition of the continental crust, Treatise on Geochemistry, 1-64, 2003.
